# Supplementary material for: Control of septin filament flexibility and bundling by subunit composition and nucleotide interactions
Source: PubMed Central journal article supplement — Mol Biol Cell. 2018 Mar 15;29(6):702–12. doi: 10.1091/mbc.E17-10-0608 (PMC6003234; doi:10.1091/mbc.e17-10-0608), 2018-03-15
Supplement: mbc-29-702-s001.pdf [file mbc-29-702-s001.pdf]

# Supplemental Materials

*Molecular Biology of the Cell*

Khan et al.

## Supplementary Material

**Table S1:** A list of all the fungal strains, plasmids and oligonucleotides that were used in the study.

### Fungal Strains

| Name    | Description                          | Source                     |
|---------|--------------------------------------|----------------------------|
| AG127   | AgSHS1-GFP: NAT                      | Helfer and Gladfelter 2006 |
| AG372.1 | Agshs1 S35V-GFP:GEN hetero           | This study                 |
| AG384.1 | AgCdc11A-GFP:GEN homo                | Bridges et al., 2016       |
| AG416   | Leu2ΔThr4Δ                           | Dundon et al., 2016        |
| AGY075  | ScCDC11-GFP::His/ScSHS1-mCherry::Gen | H. Ewers*                  |

\*Freie Universität, Berlin, Germany

### Plasmids

| Name   | Description                          | Selection Marker | Source                     |
|--------|--------------------------------------|------------------|----------------------------|
| AGB088 | pRS416 AgShs1-GFP:GEN                | amp              | Helfer and Gladfelter 2006 |
| AGB211 | pRS416 Agshs1 S35V-GFP: GEN          | amp              | This study                 |
| AGB401 | pMVB128 HIS-ScCDC12/ ScCDC10         | amp              | J. Thorner**               |
| AGB454 | pMVB133 ScCDC3/ScCDC11-GFP           | cam              | Bridges et al., 2014       |
| AGB501 | pMVB133 ScCDC3/ ScCDC11-SNAP         | cam              | Bridges et al., 2016       |
| AGB548 | pMVB133 ScCDC3/ ScSHS1-GFP           | cam              | This study                 |
| AGB560 | pCOLA-ScSHS1-GFP                     | kan              | This study                 |
| AGB561 | pMVB128 HIS-Sccd12 T75A-GFP/ ScCDC10 | amp              | This study                 |
| AGB562 | pMVB133 ScCDC3/ Sccd11 D65T-GFP      | cam              | This study                 |
| AGB598 | pRS416 ScShs1-linker-yeGFP           | kan              | This study                 |
| AGB710 | pMVB128 TEV-HIS ScCDC12/ ScCDC10     | amp              | Bridges et al., 2016       |
| AGB839 | pET-His6-GFP-TEV-LIC cloning vector  | kan              | Addgene                    |
| AGB895 | pCOLA-ScSHS1-GFP                     | kan              | This study                 |

\*\* University of California, Berkeley, CA

### Oligonucleotides

| Number | Sequence                          |
|--------|-----------------------------------|
| AGO412 | 5'-CGTCGCTGTAATCGTGATCC-3'        |
| AGO537 | 5'-CTGGTCCGCCCGTCCGAACTGGAAAG-3'  |
| AGO538 | 5'-CTTTCCAGTTCCGACGGGGCCGACCAG-3' |
| AGO541 | 5'-TGACCGCCGTCCAATATTCG-3'        |
| AGO592 | 5'-GGCCTGGGAACGTCTTTATG-3'        |

AGO593 5'-GTGTCTCCTCTGCGAGTACC-3'  
 AGO1192 5'-GCCTGATTCTGGACTTGAAC-3'  
 AGO1271 5'-GCGGGCGCAGGTGCCGGTGCAAGTAAAG-3'  
 AGO1272 5'-CTAATATACTAAGATGGGGAATTG-3'  
 AGO1273 5'-CATCTTAGTATATTAGTTAAGTATAAGAAGGAGA  
 TATACATATGAGCACTGCTTCAACACCGCC-3'  
 AGO1274 5'-GGCACCTGCGCCCGCGCCATCTCTACCCGATGCAATAGAGGCTAAATC-3'  
 AGO1320 5'-TGCTTCAACACCGCCAATTAAC-3'  
 AGO1340 5'-GAACCCATCAGAAAGGCTGTAGAAATCGATATCACAAGAG-3'  
 AGO1341 5'-CTCTTGTGATATCGATTTCTACAGCCTTTCTGATGGGTTC-3'  
 AGO1342 5'-CATACCCACGCCGAAACAAG-3'  
 AGO1347 5'-CCACAGATACGTGACAGAAATAACCTTACAATTGAG-3'  
 AGO1348 5'-CTCAATTGTAAGGTTATTTCTGTGCGACGTATCTGTGG-3'  
 AGO1349 5'-CCGTCCCTACAAAGAAGAAG-3'  
 AGO1350 5'-TGCTGATCACAGGGATGATG-3'  
 AGO1496 5'-CCTCAAGACCCGTTTAGAGG-3'  
 AGO1805 5'-TGCTTAAGTCGAACAGAAAG-3'  
 AGO1806 5'-ATCTCTACCCGATGCAATAG-3'  
 AGO1807 5'-CTATTGCATCGGGTAGAGATATCGGTGACGGTGCTGGT-3'  
 AGO1808 5'-CTTTCTGTTCGACTTAAGCATGCCGGTAGAGGTGTGGTC-3'

Supplementary Movie- Video 1- Filaments formed on a SLB by addition of 5 nM total protein containing Cdc11 only complexes, corresponding to Figure 2. Time lapse was acquired via TIRF microscopy with a 100 ms exposure and a 250 ms interval.

Supplementary Movie- Video 2- Filaments formed on a SLB by mixing Cdc11 and Shs1 complexes in a 1:1 ratio to a final protein concentration of 5 nM, corresponding to Figure 2. Video was acquired with a 100 ms exposure and 250 ms time interval.

Supplementary Movie- Video 3- Filaments formed in absence or presence of nucleotide using 5 nM protein and 5  $\mu$ M nucleotide, corresponding to Figure 3.
